# Supplementary material for: Neutralising antibodies in Spike mediated SARS-CoV-2 adaptation
Source: PubMed Central journal article supplement — medRxiv. 2020 Dec 29:2020.12.05.20241927. Preprint. [Version 3] doi: 10.1101/2020.12.05.20241927 (PMC7781345; doi:10.1101/2020.12.05.20241927), 2020-12-29

**Supplementary Figure 8. Maximum-Likelihood global phylogeny of SARS-CoV-2.** To ensure that the patient case was not resultant of a superinfection event, all patient sequences were aligned with a snapshot of global SARS-CoV-2 sequences downloaded from the GISAID database between 1<sup>st</sup> April and 5<sup>th</sup> May (26472 sequences, only full sequences and excluding all low coverage sequences). Sequences were aligned using MAFFT and a maximum-likelihood tree inferred with IQTREE v2.1.3. All 23 sequenced from the patient case (red) formed a distinct clade, suggesting that all viral populations diversified within-host.

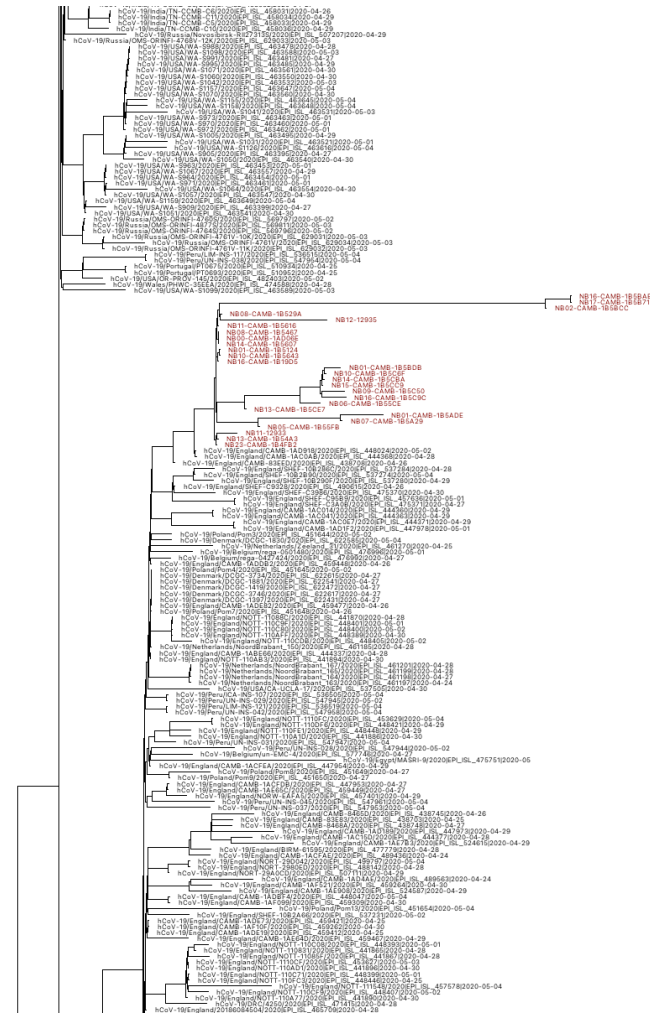

Supplement: NIHPP2020.12.05.20241927-supplement-1.pdf [file NIHPP2020.12.05.20241927-supplement-1.pdf]
